# Supplementary material for: Rational management approach to pure red cell aplasia
Source: PubMed Central journal article supplement — Haematologica. 2017 Dec 7;103(2):221–30. doi: 10.3324/haematol.2017.175810 (PMC5792266; doi:10.3324/haematol.2017.175810), 2018-02
Supplement: 2017_175810-Disclosures_and_Contributions.pdf [file 2017_175810-Disclosures_and_Contributions.pdf]

Haematologica  
HAEMATOL/2017/175810  
Version 3

Rational management approach to pure red cell aplasia

Suresh Kumar Balasubramanian, Meena Sadaps, Swapna Thota, Mai Aly, Bartłomiej P. Przychodzen, Cassandra M. Hirsch, Valeria Visconte, Tomas Radivoyevitch, and Jaroslaw P. Maciejewski

Disclosures: none

Contributions: S.K.B., designed the research, collected and analyzed the data, and wrote the paper, M.S., collected the clinical data, S.T., M.A., V.V., helped with interpretation of the results and edited the manuscript, B.P.P., C.H., performed research procedures, T.R., helped with statistics, J.P.M., designed the study and wrote the manuscript.
